# Supplementary figures and images for: The Resistance to Traction Forces Differs Substantially Between Intestinal Parts, but Not Between In- and Outbred Strains of Mice
Source: MDPI journal article supplement (doi:10.3390/gastroent17010012), 2026-02-07

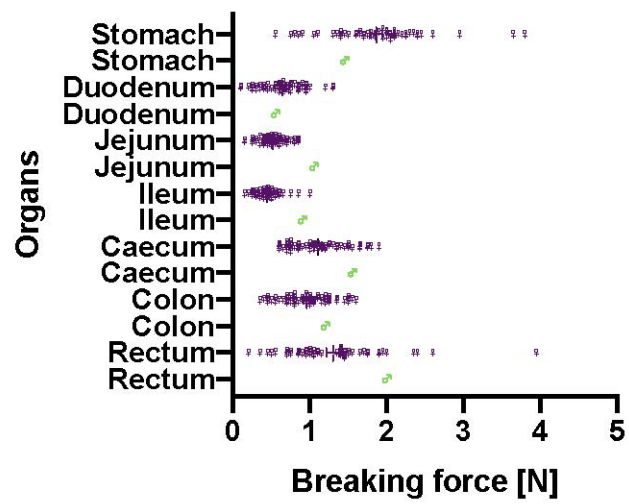

**Figure S1.** Individual measurements of the breaking forces separated by sex of the Crl:CD1(ICR) mice.

Supplement: s1 [file gastroent-4064155-supplementary.pdf › gastroent-4064155-supplementary.pdf]
